# Supplementary material
Source: PubMed Central journal article supplement (PMC3308812)

### *Supplemental data*

#### **Figure 1. Lack of dopaminergic ligands effects on the presence of D<sub>2L</sub> and D<sub>3</sub> homomers.**

Untreated cells untreated (**open bars**) or those induced to express a dopamine receptor construct by exposure to doxycycline 1 ng.mL<sup>-1</sup> (**chequered and filled bars**) were studied: VSV-G-SNAP-D<sub>2L</sub> (**A-C**), VSV-SNAP-D<sub>3</sub> (**D-F**), HA-CLIP-D<sub>2L</sub> (**G-I**) or HA-CLIP-D<sub>3</sub> (**J-L**) receptors. Cells were labelled (1 h at 37°C) with either SNAP-Lumi4<sup>®</sup>Tb (10 nM) and SNAP-Red (100 nM) (**A-F**) or CLIP-Lumi4<sup>®</sup>Tb (20 nM) and CLIP-Red (100 nM) (**G-L**) before washing (4 times) and addition of 10 µM of a dopaminergic ligand (**chequered bars**): dopamine (**A, D, G and J**), (+)butaclamol (**B, E, H and K**), pergolide (**C, F, I and L**) or buffer (**filled bars**). After excitation at 337 nm, fluorescence was measured at 665 nm following incubation at 37°C for either 5 or 30 min. Data are means ± SEM from n = 3-4 experiments performed in triplicate.

#### **Figure 2. Lack of dopaminergic ligands effect on the maintenance of homomers and**

**heteromers in clonal cell line B6.** Clone B6 cells that express VSV-G-SNAP-D<sub>2L</sub> in response to doxycycline and constitutively express HA-CLIP-D<sub>3</sub> were untreated (**open bars**) or induced to express VSV-G-SNAP-D<sub>2L</sub> with doxycycline (1 ng.mL<sup>-1</sup>) (**chequered and filled bars**). These were labelled (1 h at 37°C) with either SNAP-Lumi4<sup>®</sup>Tb (10 nM) and SNAP-Red (100 nM) (**A and E**), CLIP-Lumi4<sup>®</sup>Tb (20 nM) and CLIP-Red (100 nM) (**B and F**), SNAP-Lumi4<sup>®</sup>Tb (10 nM) and CLIP-Red (100 nM) (**C and G**) or CLIP-Lumi4<sup>®</sup>Tb (20 nM) and SNAP-Red (100 nM) (**D and H**) before washing (4 times) and addition of 10 µM dopamine (**A-D**), pramipexole (**E-H**) (**chequered bars**) or buffer (**filled bars**). After excitation at 337 nm, fluorescence was measured at 665 nm following incubation at 37°C for either 5 or 30 min. Data are means ± SEM from n = 3-4 experiments performed in triplicate.

Supplemental Figure 1.

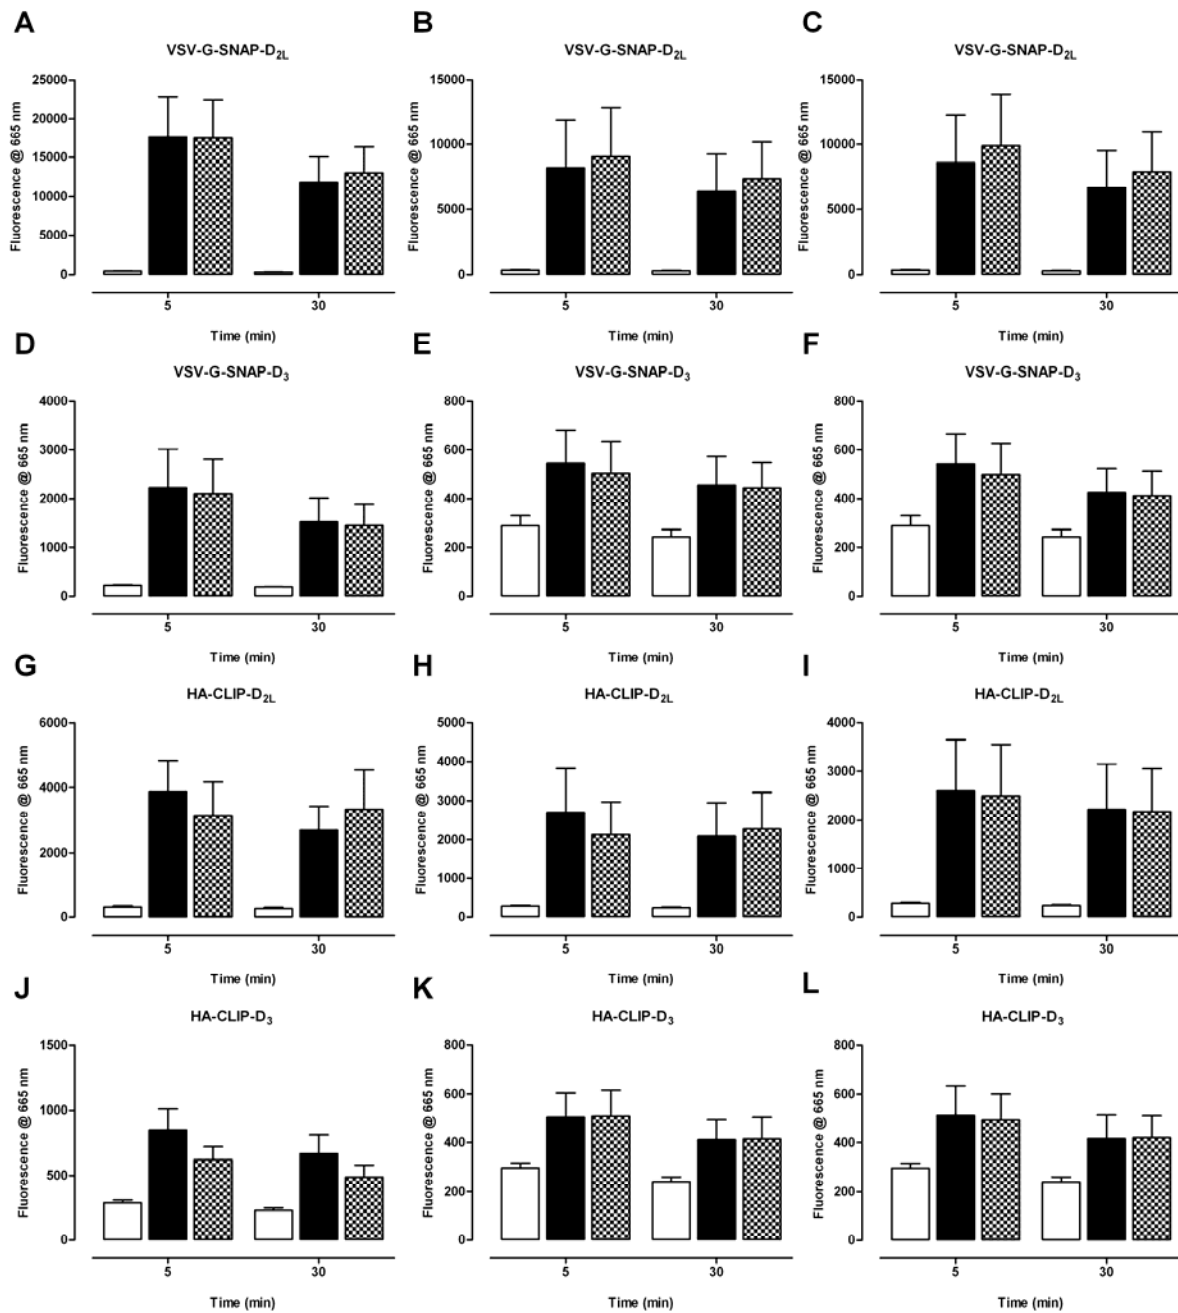

Supplemental Figure 2.

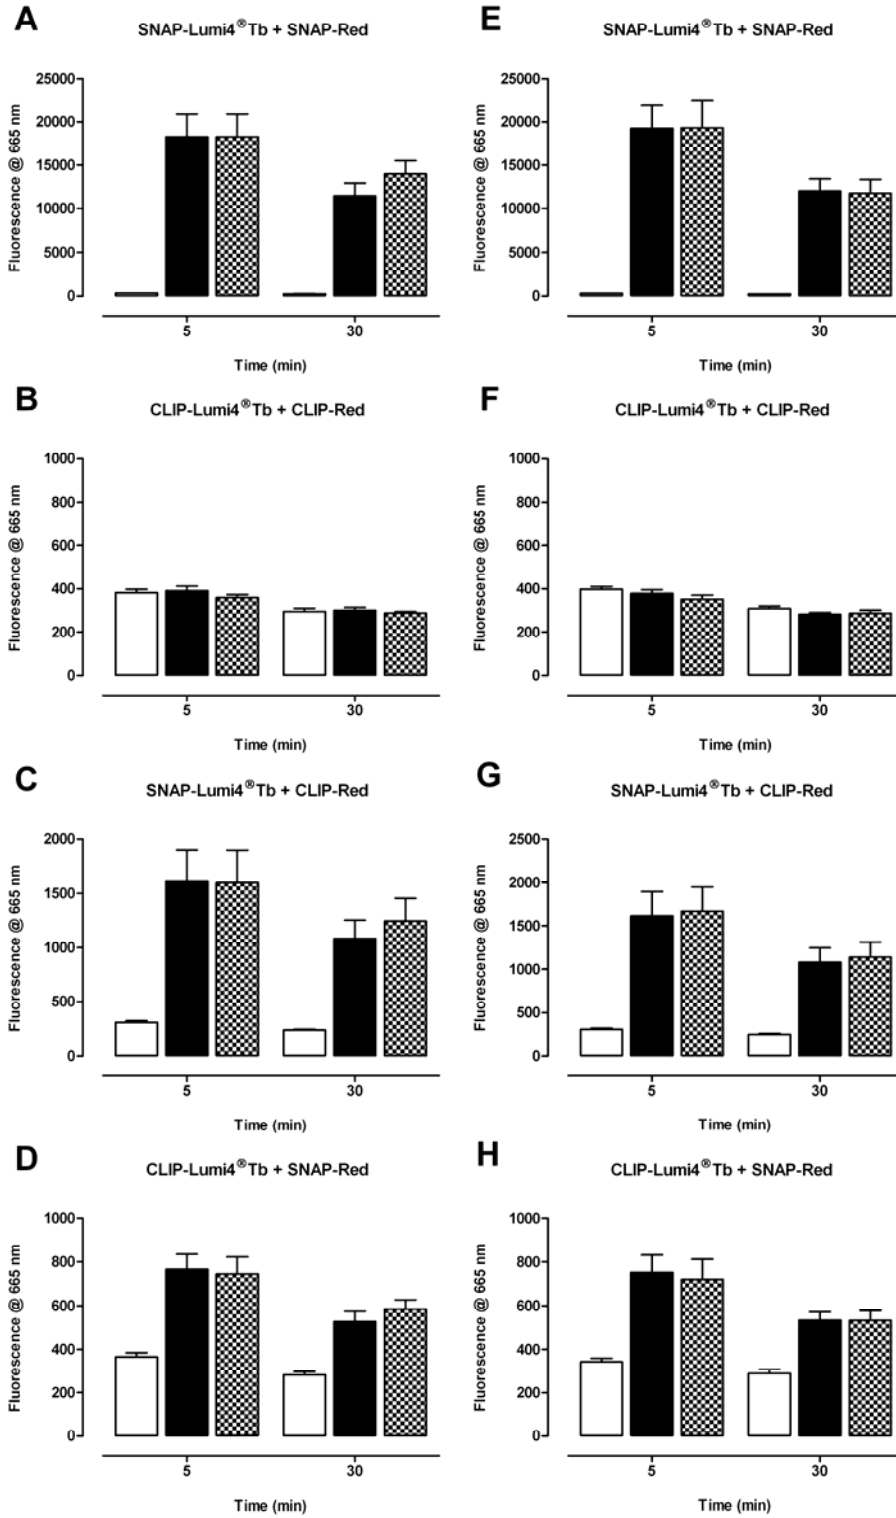

Supplement: supp_M111.326678_jbc.M111.326678-1.pdf [file supp_M111.326678_jbc.M111.326678-1.pdf]
